# Supplementary material
Source: Royal Society of Chemistry journal article supplement (doi:10.1039/d6cy00175k)
Supplement: d6cy00175k1.pdf [file d6cy00175k1.pdf]

# Structural Steering of Bismuth Chalcogenides to Oriented Bismuth Catalyst toward Efficient CO<sub>2</sub> Reduction

*Yao Xia<sup>a,c</sup>, Jiacheng Liu<sup>a,c</sup>, Guodong Wu<sup>a</sup>, Ying Shi<sup>a</sup>, Dingding Dong<sup>a</sup>, Junpeng Liu<sup>a</sup>,  
Chi Wang<sup>b</sup>, Dandan Feng<sup>b</sup>, Yu Su<sup>\*b</sup>, Huiwen Lin<sup>\*a</sup>*

<sup>a</sup> School of Materials Science and Engineering, Southeast University, Nanjing 211189,  
PR China

<sup>b</sup> School of Science, China Pharmaceutical University, Nanjing 211198, PR China

<sup>c</sup> These authors contribute equally.

Corresponding E-mail addresses: [suyu@cpu.edu.cn](mailto:suyu@cpu.edu.cn); [linh@seu.edu.cn](mailto:linh@seu.edu.cn)

KEYWORDS: Electrochemical carbon dioxide reduction; electrochemical reconstruction; bismuth chalcogenide, structural steering

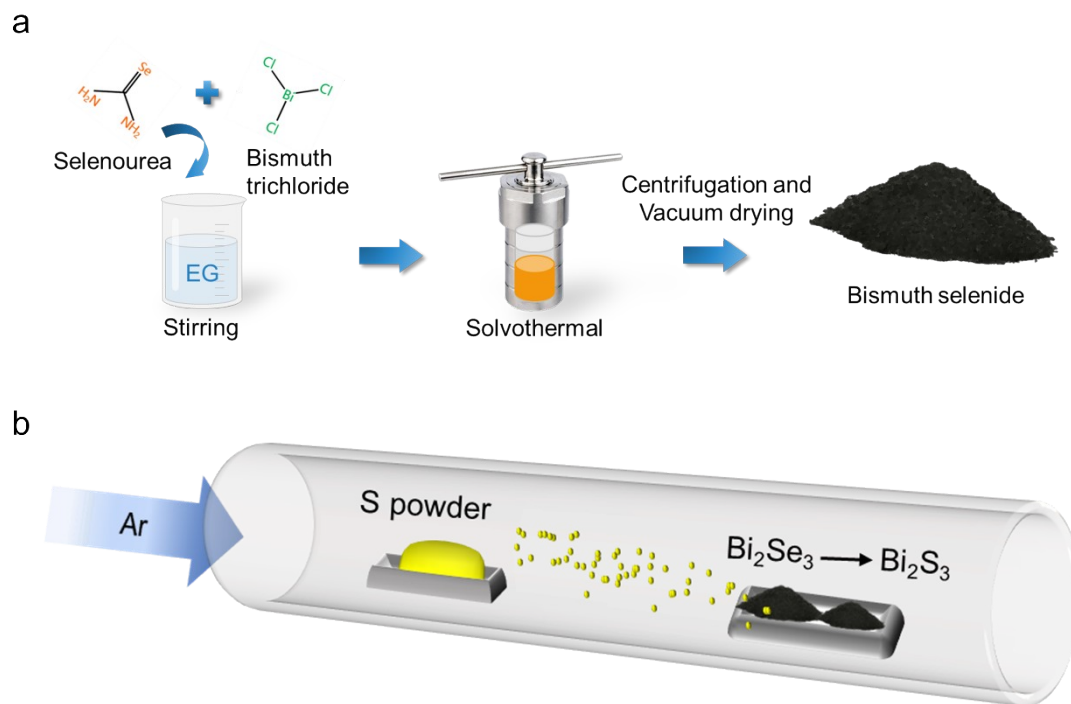

**Figure S1.** Schematic illustration of the hydrothermal process for the preparation of (a)  $\text{Bi}_2\text{Se}_3$ , and (b)  $\text{Bi}_2\text{S}_3$  nanosheets.

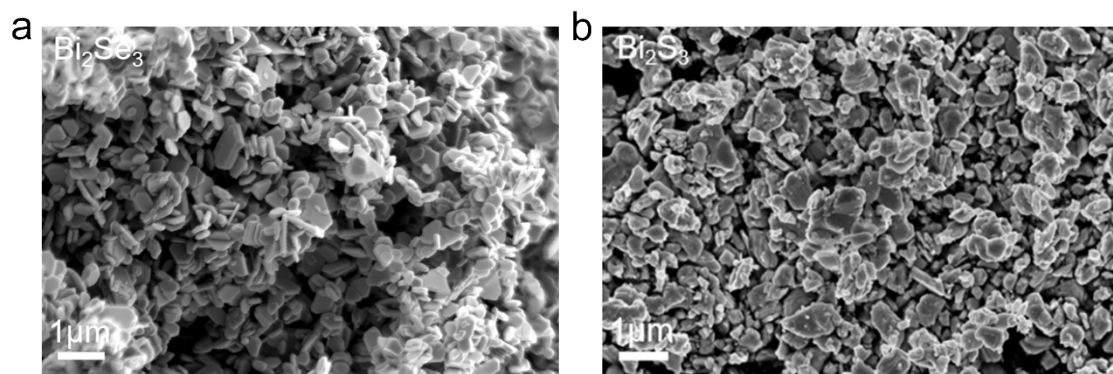

**Figure S2.** SEM images of nanosheets. (a) Bi<sub>2</sub>Se<sub>3</sub>, and (b) Bi<sub>2</sub>S<sub>3</sub>.

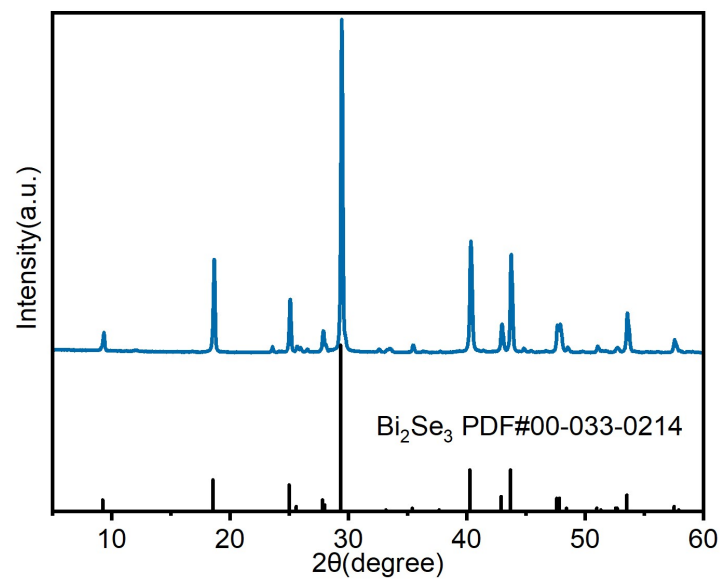

**Figure S3.** XRD pattern of  $\text{Bi}_2\text{Se}_3$ .

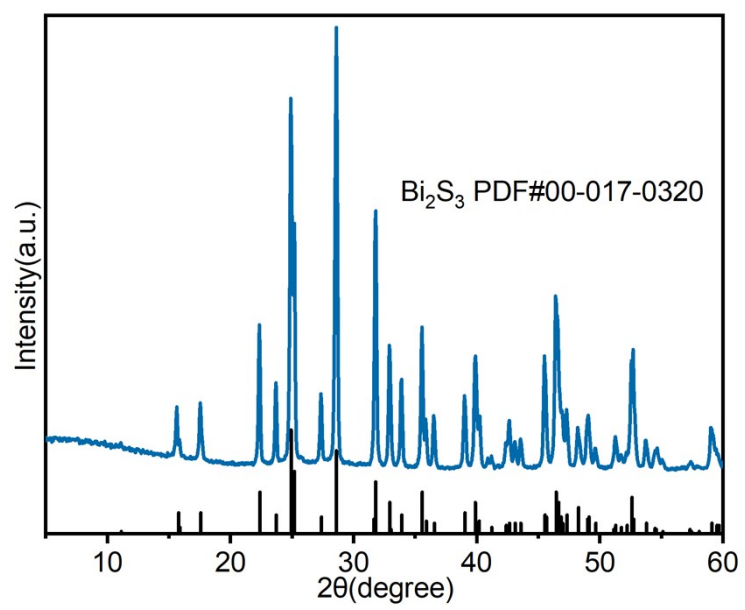

**Figure S4.** XRD pattern of  $\text{Bi}_2\text{S}_3$ .

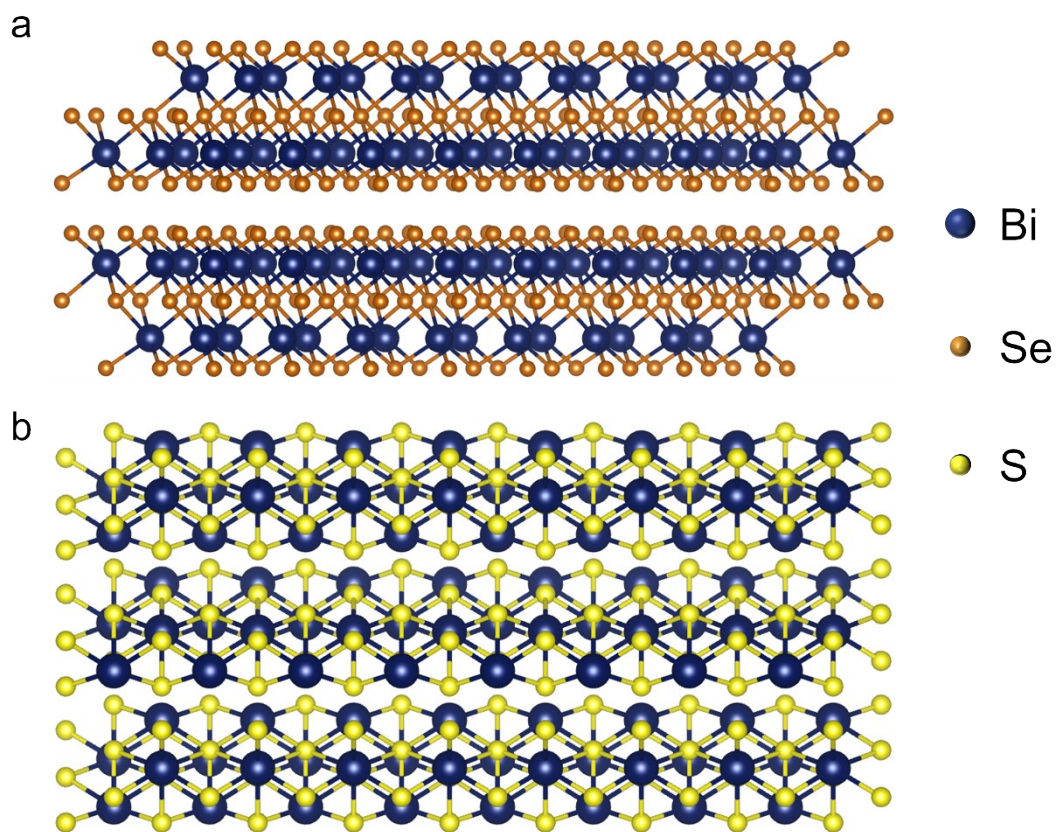

**Figure S5.** Schematic illustration of the atomic structure of (a)  $\text{Bi}_2\text{Se}_3$ , (b)  $\text{Bi}_2\text{S}_3$ .

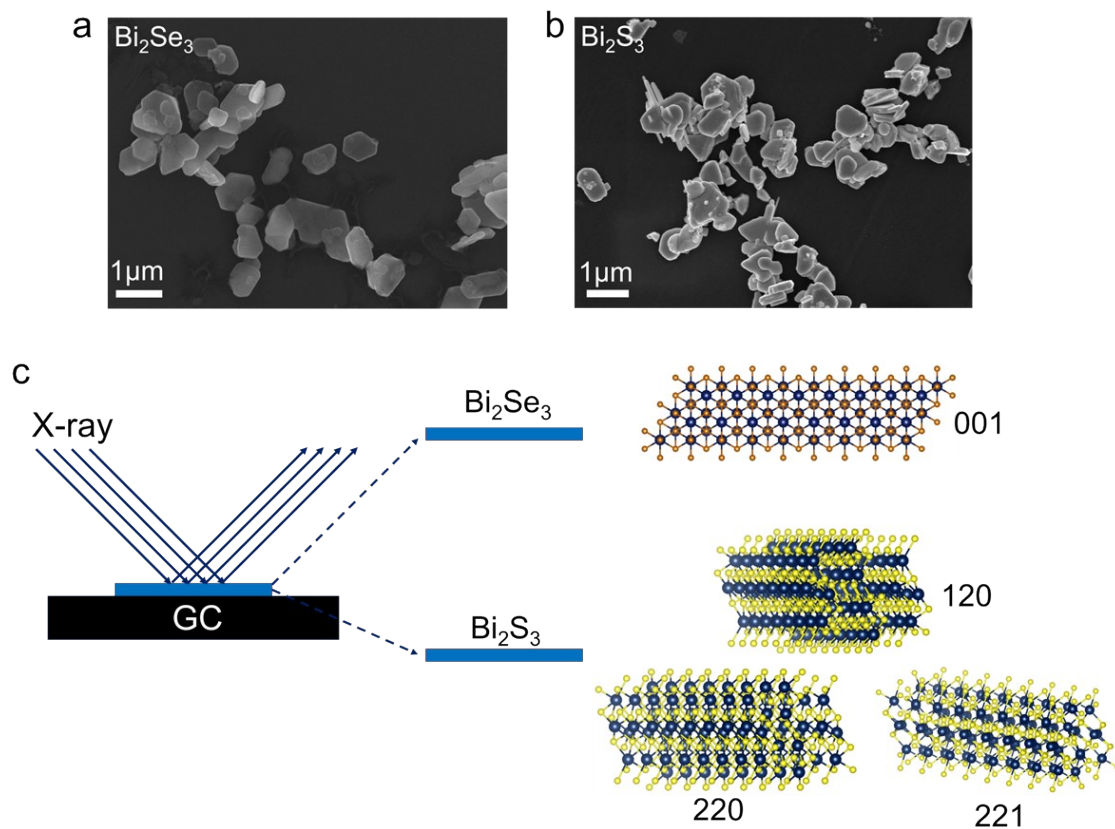

**Figure S6.** SEM images of (a)  $\text{Bi}_2\text{Se}_3$ , (b)  $\text{Bi}_2\text{S}_3$  inks spin-coated onto a smooth glassy carbon electrode. (c) Schematic illustration of XRD diffraction and the exposed specific crystal planes of the catalyst.

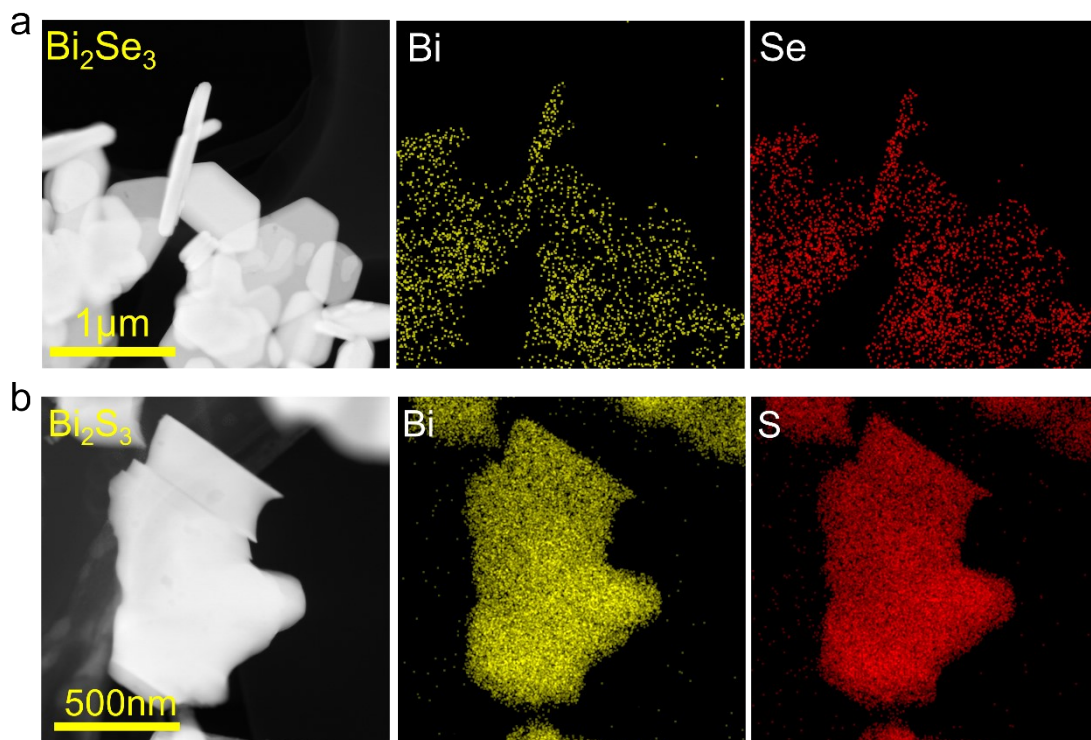

**Figure S7.** TEM images of (a)  $\text{Bi}_2\text{Se}_3$ , (b)  $\text{Bi}_2\text{S}_3$  nanosheets, and EDS elemental maps.

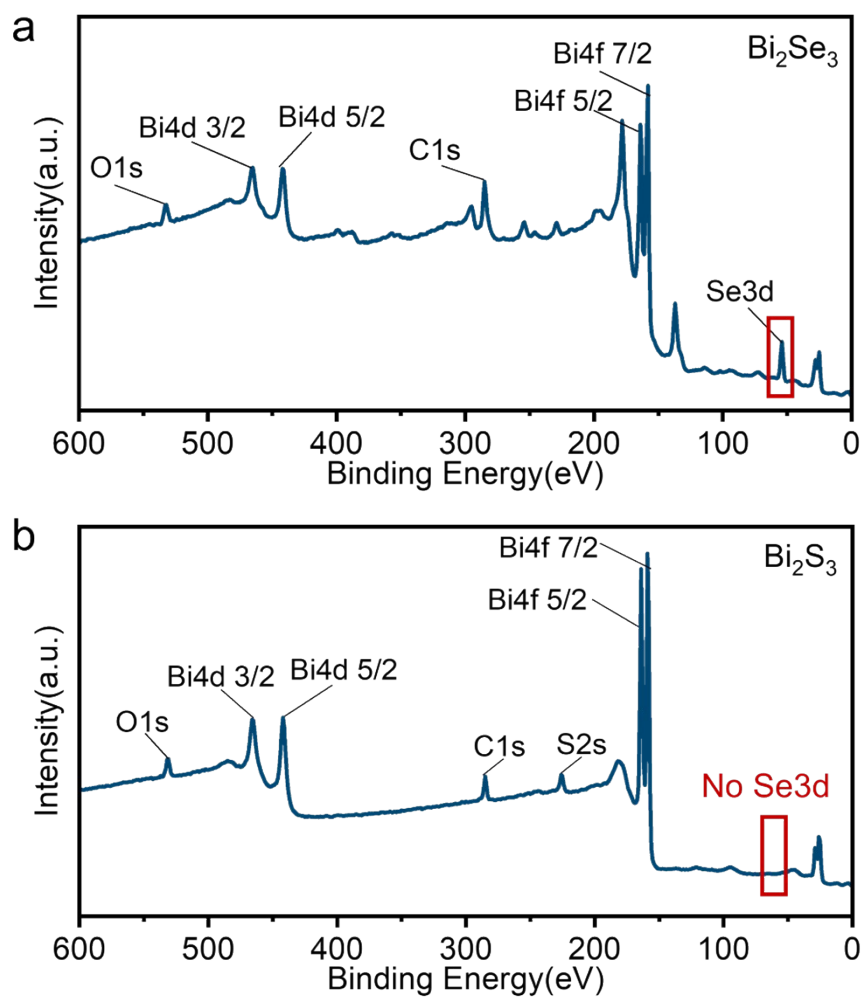

**Figure S8.** Full spectra of the high-resolution XPS profiles for (a)  $\text{Bi}_2\text{Se}_3$ , (b)  $\text{Bi}_2\text{S}_3$ .

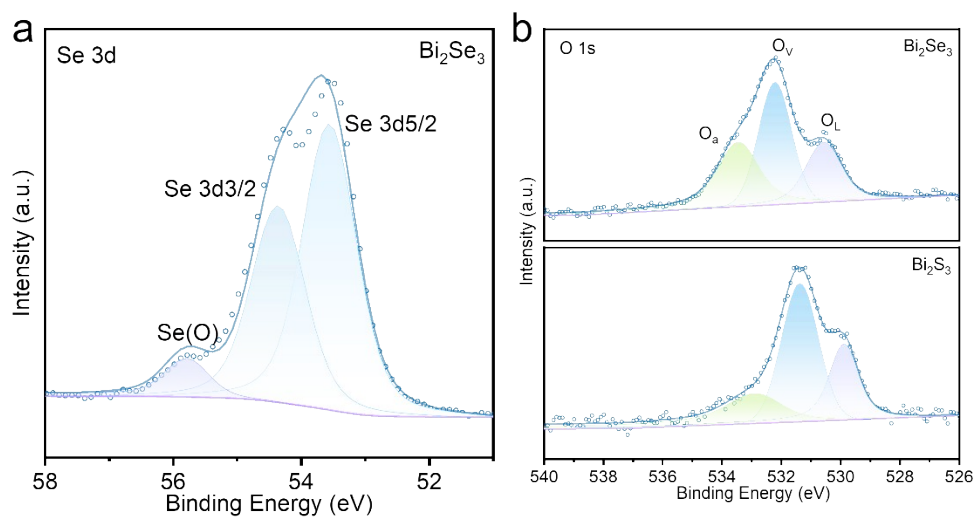

**Figure S9.** (a) High-resolution XPS spectra of Se 3d. (b) High-resolution XPS spectra of O 1s for  $\text{Bi}_2\text{Se}_3$  and  $\text{Bi}_2\text{S}_3$ .

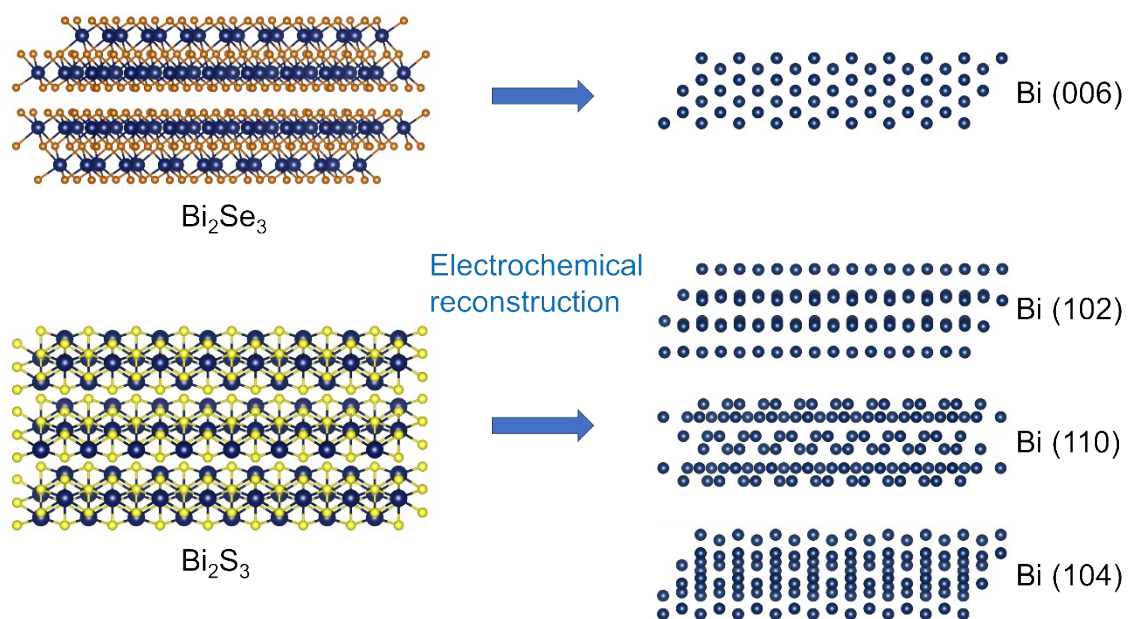

**Figure S10.** Schematic illustration of the electrochemical reconstruction process of  $\text{Bi}_2\text{Se}_3$  and  $\text{Bi}_2\text{S}_3$  on a glassy carbon electrode.

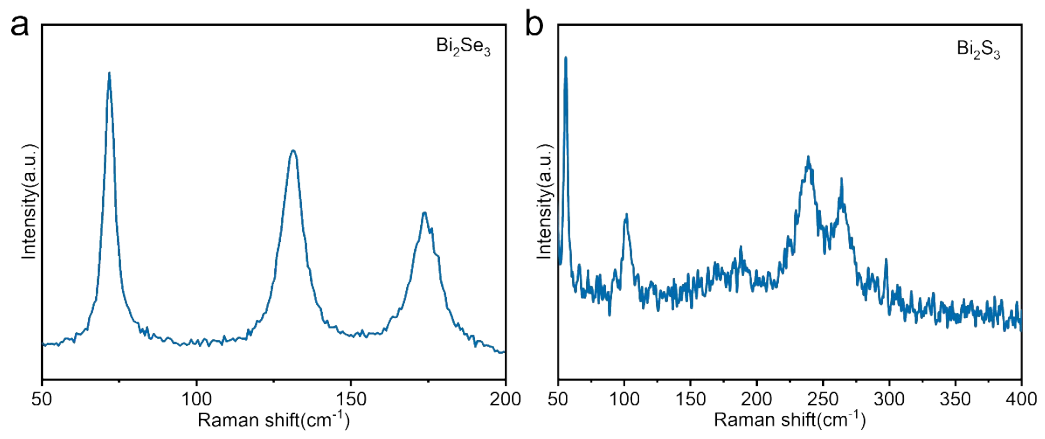

**Figure S11.** Raman spectra of (a)  $\text{Bi}_2\text{Se}_3$ , (b)  $\text{Bi}_2\text{S}_3$ .

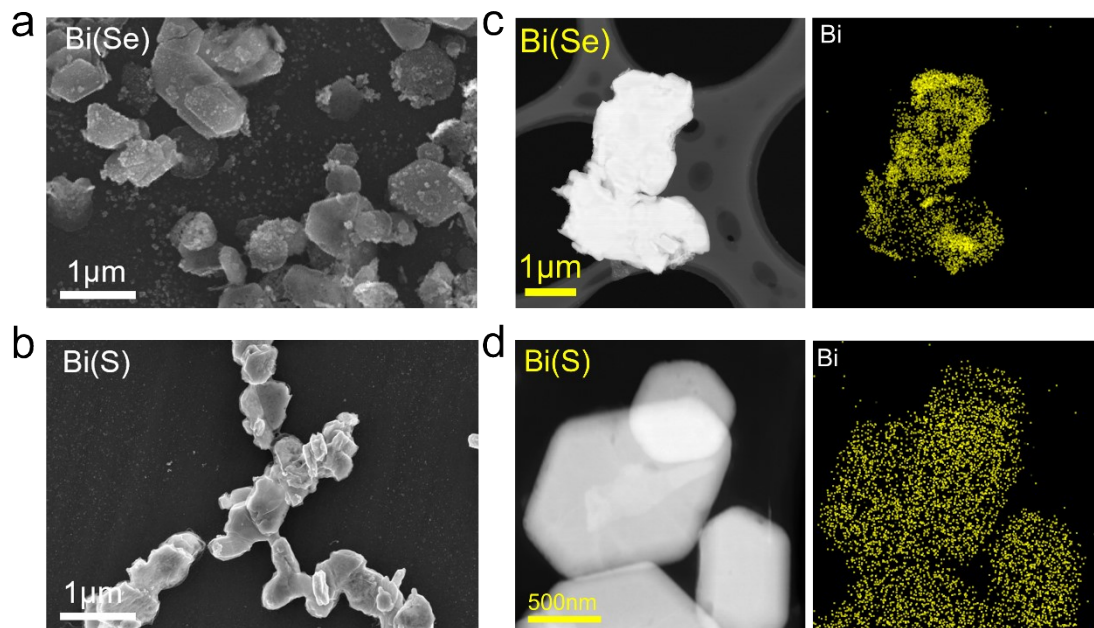

**Figure S12.** SEM images of (a) Bi<sub>2</sub>Se<sub>3</sub>, (b) Bi<sub>2</sub>S<sub>3</sub>. TEM images of (c) Bi<sub>2</sub>Se<sub>3</sub>, (d) Bi<sub>2</sub>S<sub>3</sub>, and EDS elemental maps.

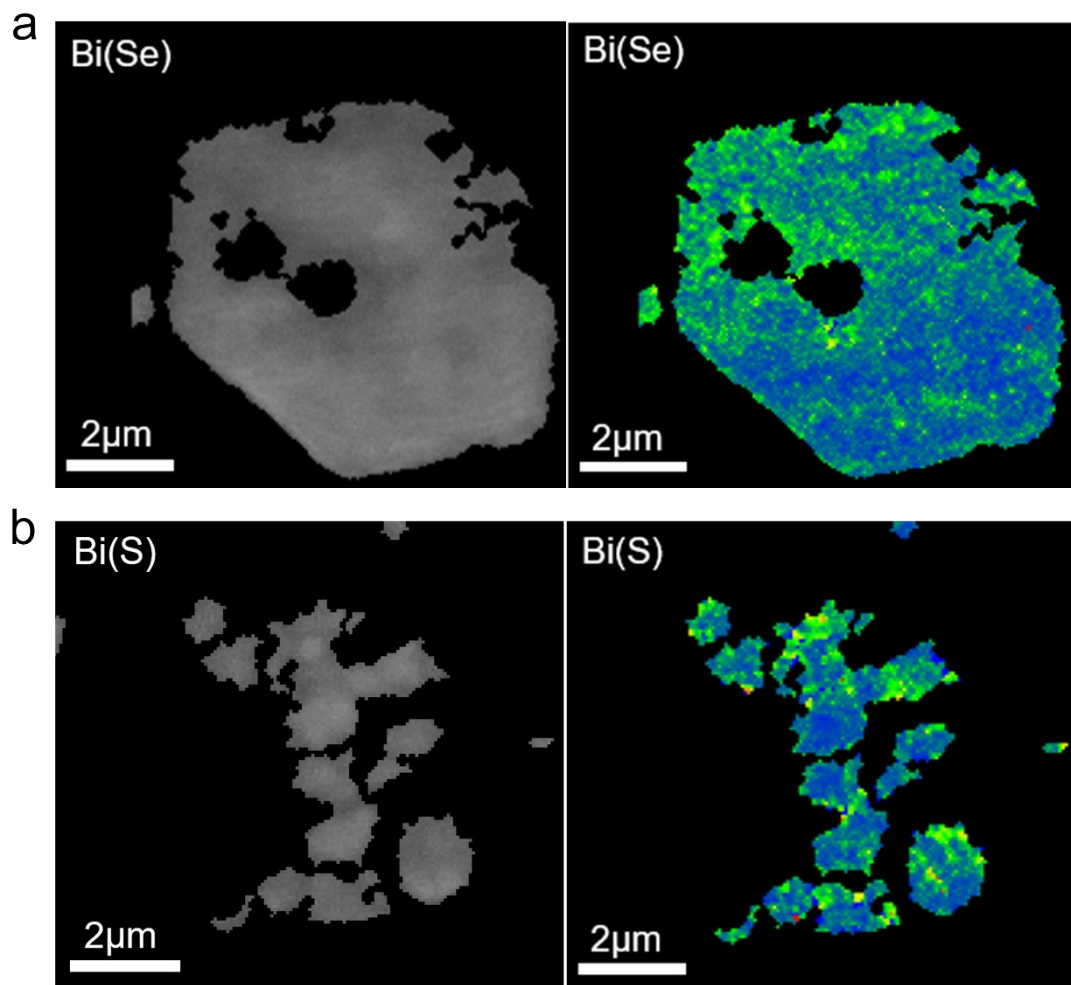

**Figure S13.** BC maps and KAM maps of (a) Bi(Se), (b) Bi(S).

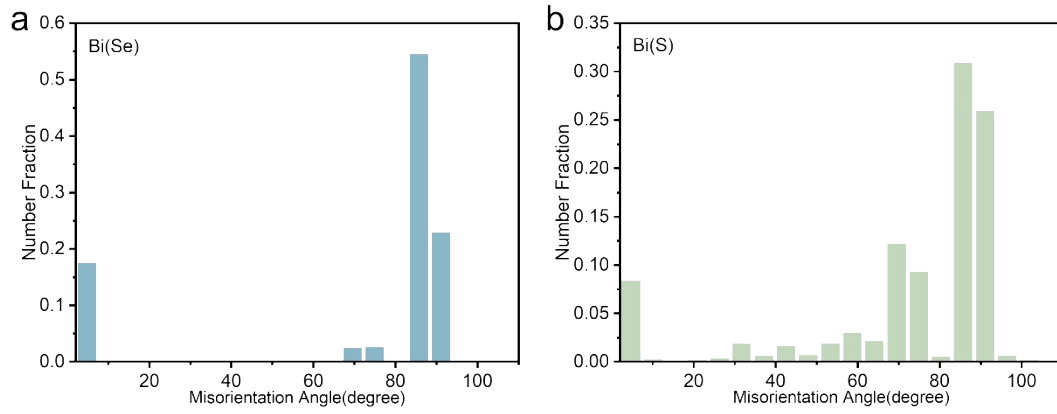

**Figure S14.** Proportion of the misorientation angle for (a) Bi(Se), (b) Bi(S).

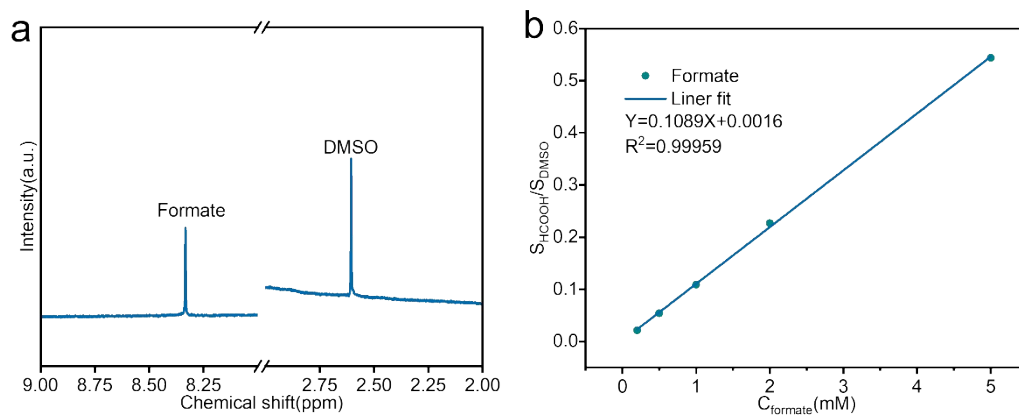

**Figure S15.** (a)  $^1\text{H}$  NMR spectrum of formate. (b) Calibration curve for formate concentration.

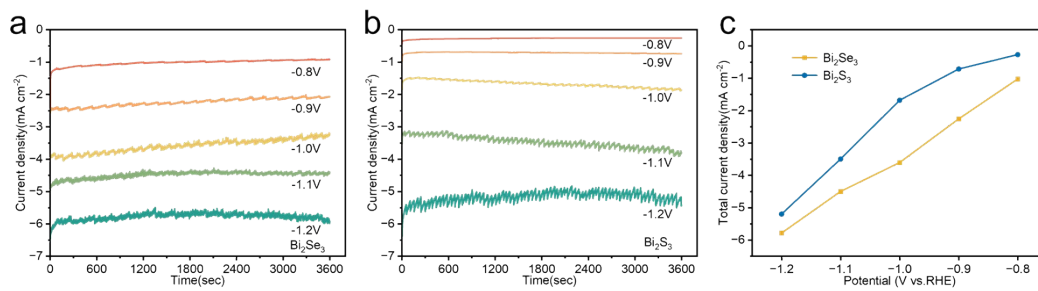

**Figure S16.** Total current density versus time curve at the (a) Bi(Se), (b) Bi(S) test potential. (c) Total current density at the test potential.

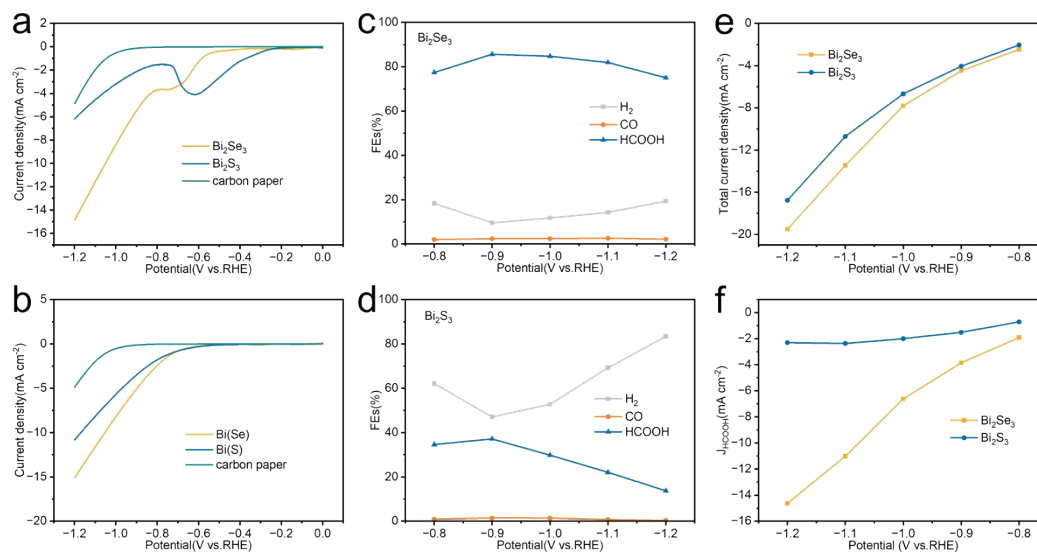

**Figure 17.** (a) LSV curves of Bi<sub>2</sub>Se<sub>3</sub>, Bi<sub>2</sub>S<sub>3</sub>, and carbon paper using an H-type cell at the scan rate of 10 mV s<sup>-1</sup> in CO<sub>2</sub>-saturated 0.5 M KHCO<sub>3</sub> solution. (b) LSV curves of Bi(Se), Bi(S), and carbon paper using an H-type cell at the scan rate of 10 mV s<sup>-1</sup> in CO<sub>2</sub>-saturated 0.5 M KHCO<sub>3</sub> solution. Faradaic efficiency of formate, CO, and H<sub>2</sub> from -0.8 to -1.2 V vs. RHE in (c) Bi(Se), (d) Bi(S) using an H-type cell. (e) Total current density at the test potential. (f) Partial current densities for formate.

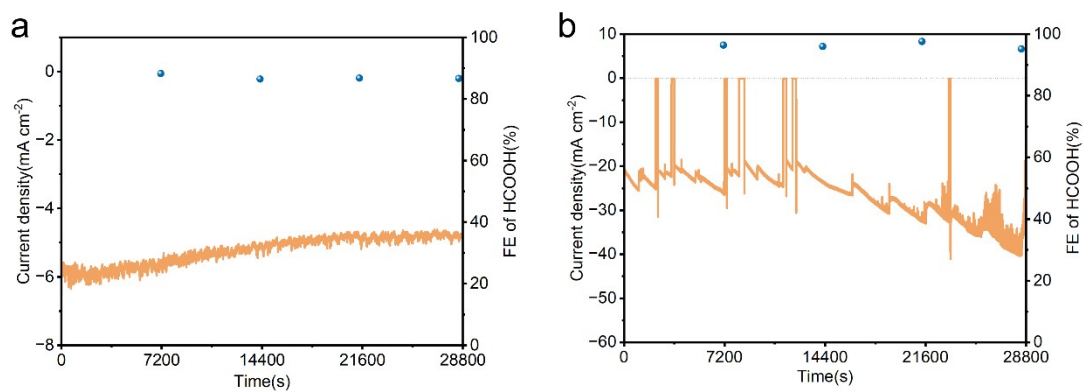

**Figure S18.** (a) Chronoamperometric current density and corresponding Faradaic efficiency toward formate for Bi(Se) at -1.0 V versus RHE in an H-type cell. (b) Chronoamperometric current density and corresponding Faradaic efficiency toward formate for Bi(Se) at -1.2 V versus RHE in a GDE cell.

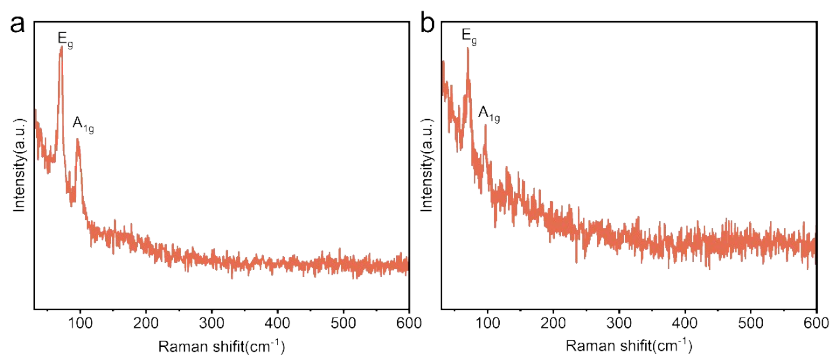

**Figure S19.** Raman images of Bi(Se) (a) in an H-type cell; (b) in a GDE cell.

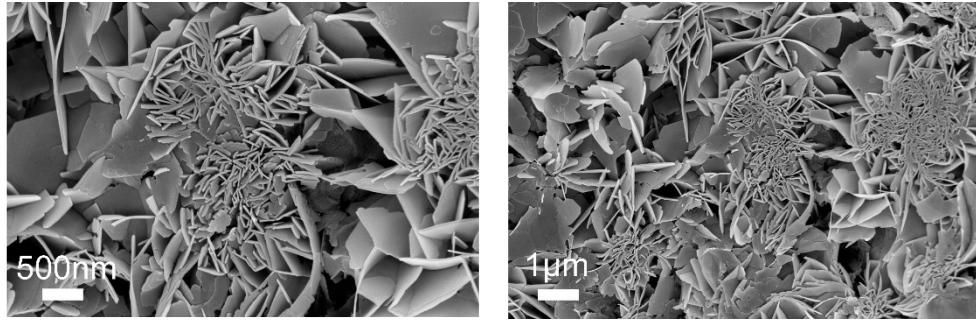

**Figure S20.** SEM images of Bi(Se) after prolonged testing in an H-type cell.

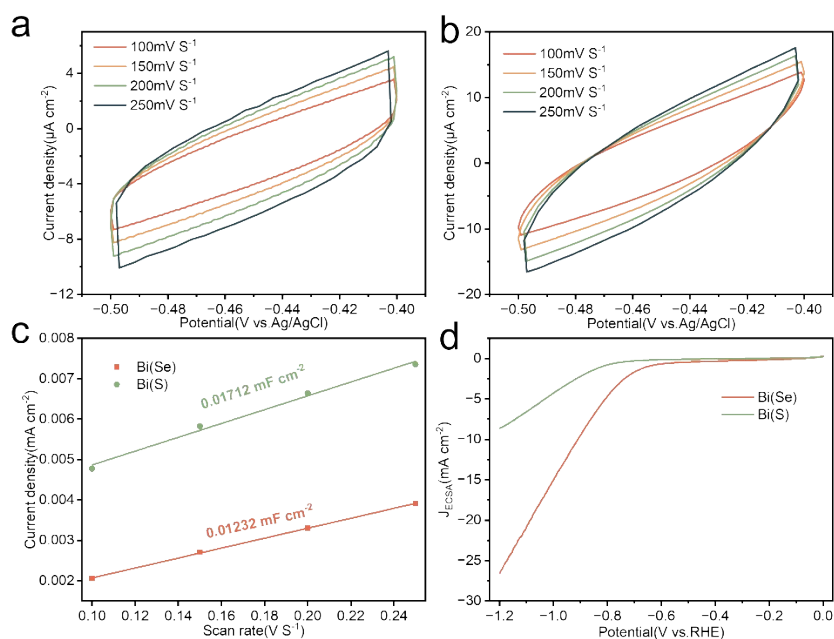

**Figure S21.** CV curves at varying scan rates for ECSA measurements of (a) Bi(Se), (b) Bi(S) in CO<sub>2</sub>-saturated 0.5 M KHCO<sub>3</sub>. (c) Plots of charging current density at -0.35 V vs Ag/AgCl after catalysis versus scan rate for all samples to determine the double-layer capacitance ( $C_{dl}$ ). (d) The LSV curves were normalized by the ECSA to assess the intrinsic catalytic activity of the catalyst.

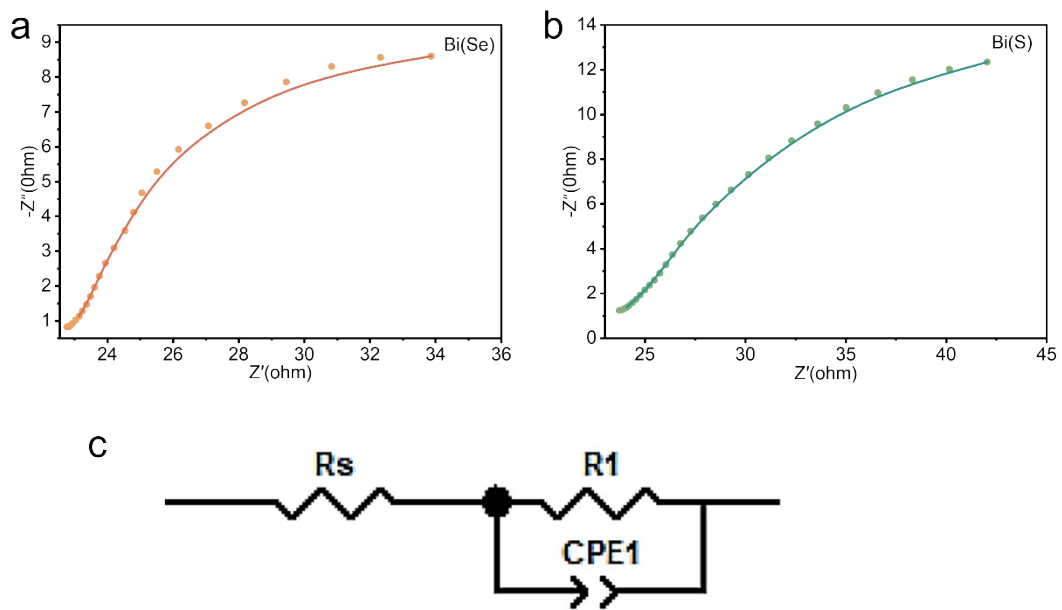

**Figure S22.** Nyquist plots (a) Bi(Se), (b) Bi(S) measured at -1.0 V vs RHE in  $\text{CO}_2$ -saturated 0.5 M  $\text{KHCO}_3$ . (c) Corresponding impedance fitting circuit diagram.

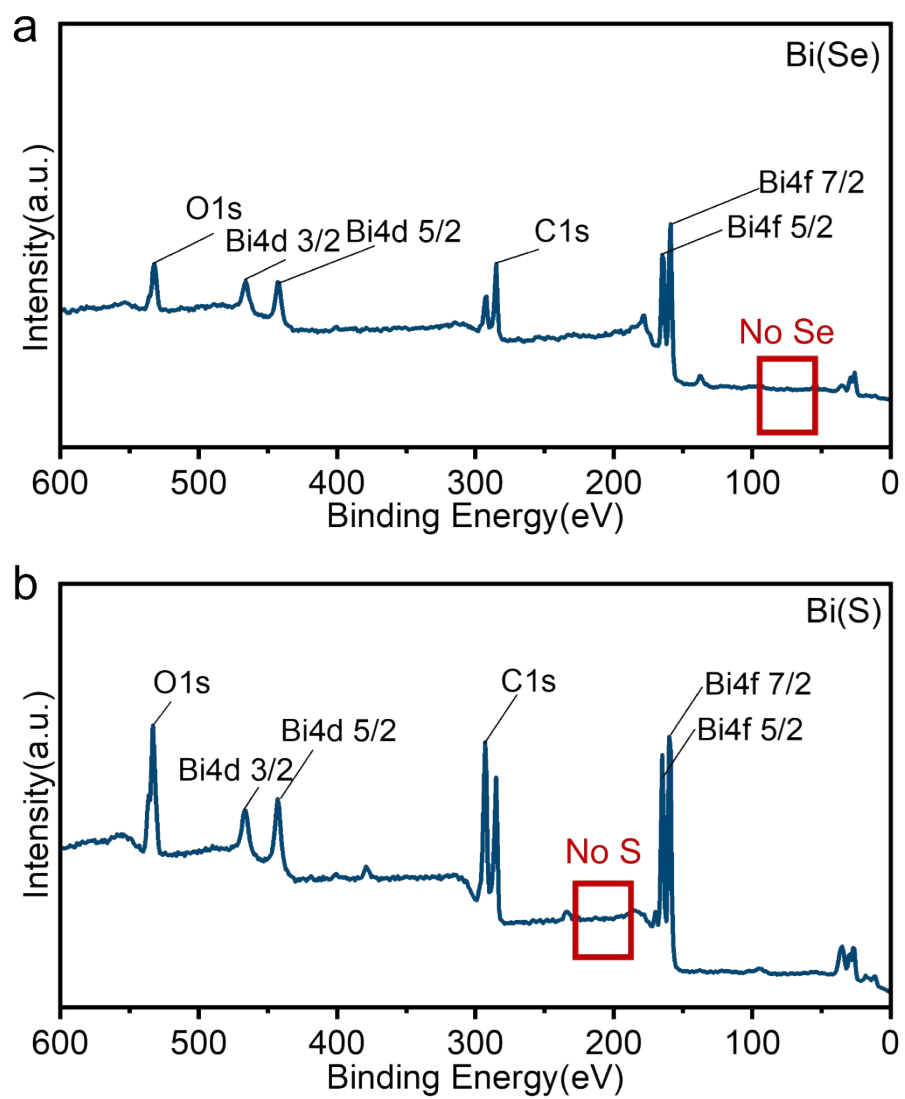

**Figure S23.** Full spectra of the high-resolution XPS profiles for (a) Bi(Se), (b) Bi(S).

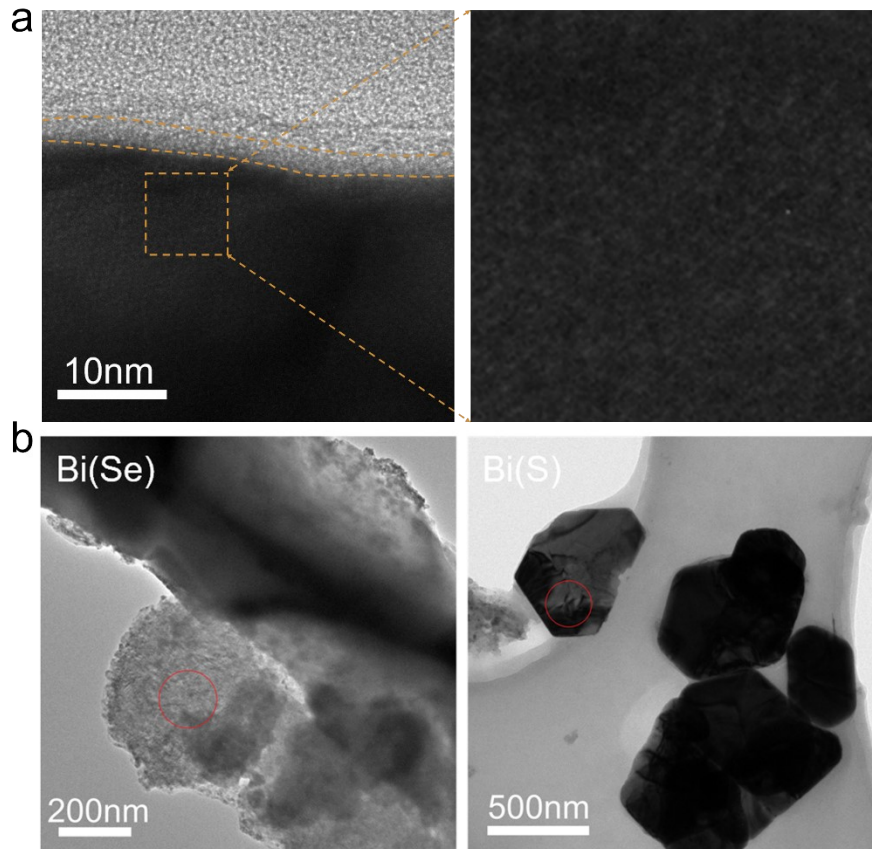

**Figure S24.** (a) HRTEM images of Bi(S) revealing an oxidative layer at the nanosheet edges. (b) TEM images of the SAED corresponding to Figures 2f and 2g.

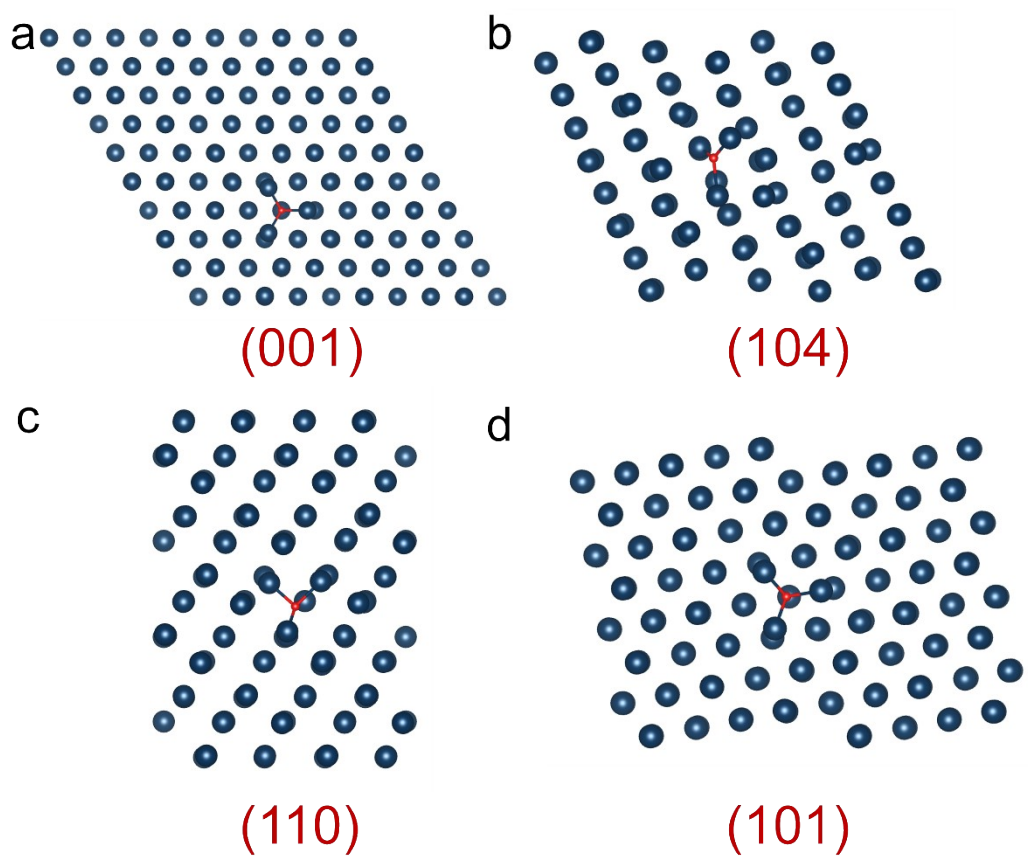

**Figure S25.** Models of lattice oxygen coordination on different crystal facets.

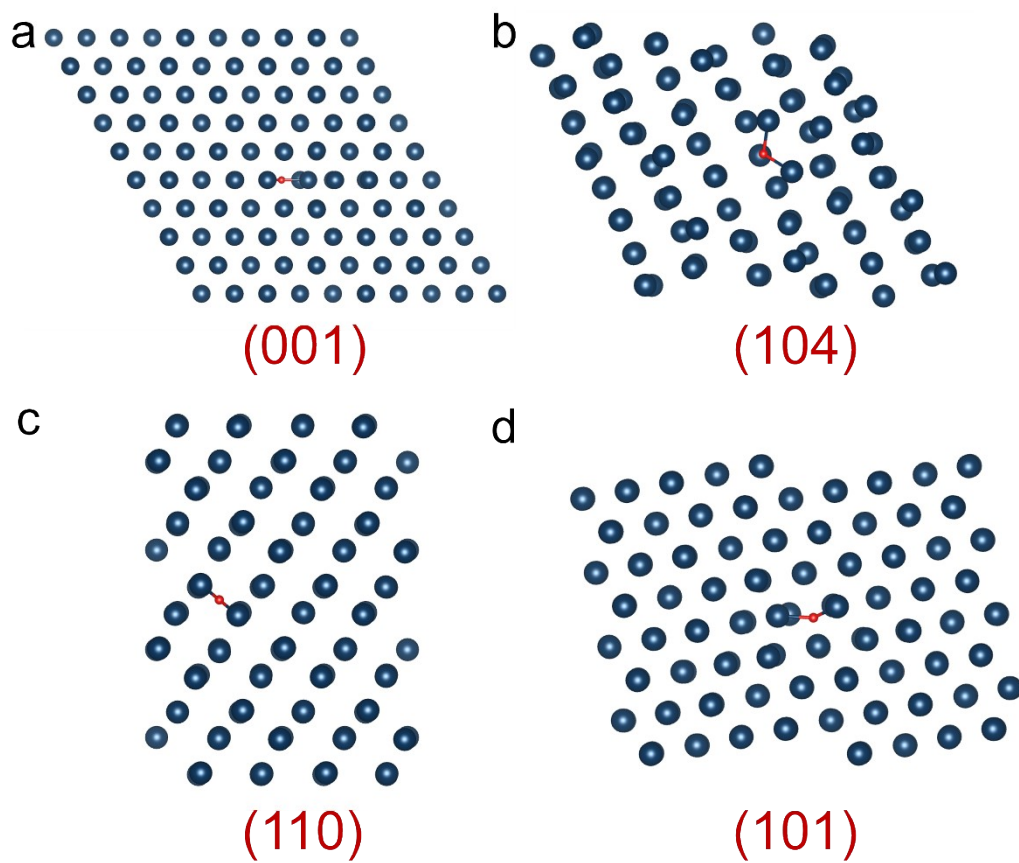

**Figure S26.** Models of defective oxygen coordination on different crystal facets.

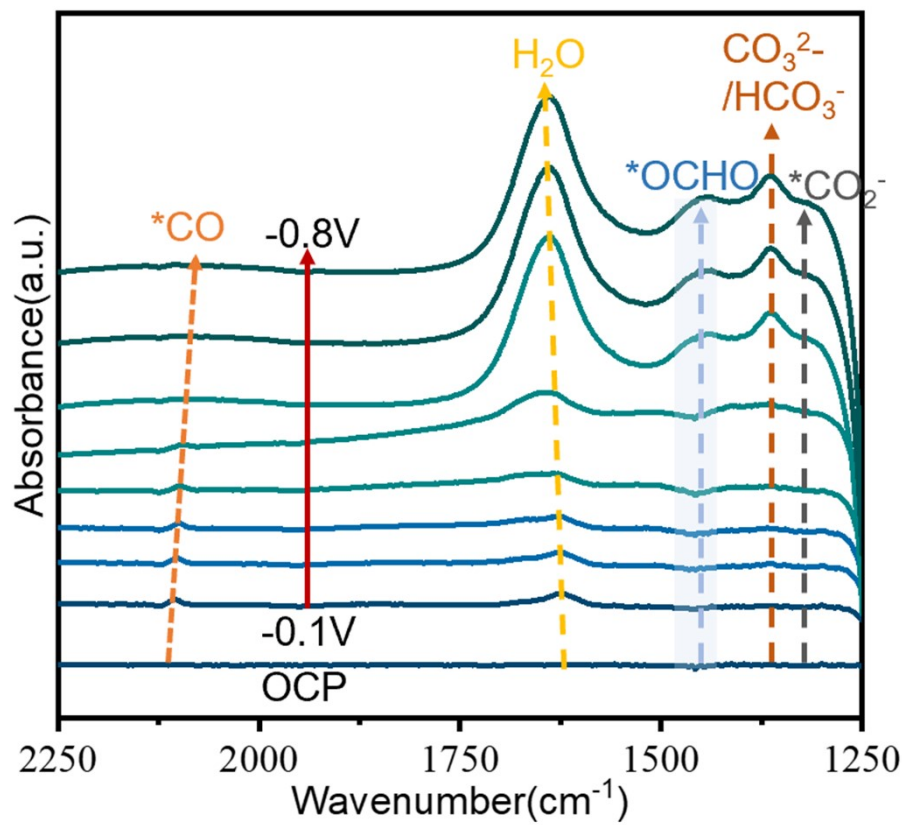

**Figure S27.** Operando ATR-FTIR spectra of Bi(Se) collected under applied potentials.

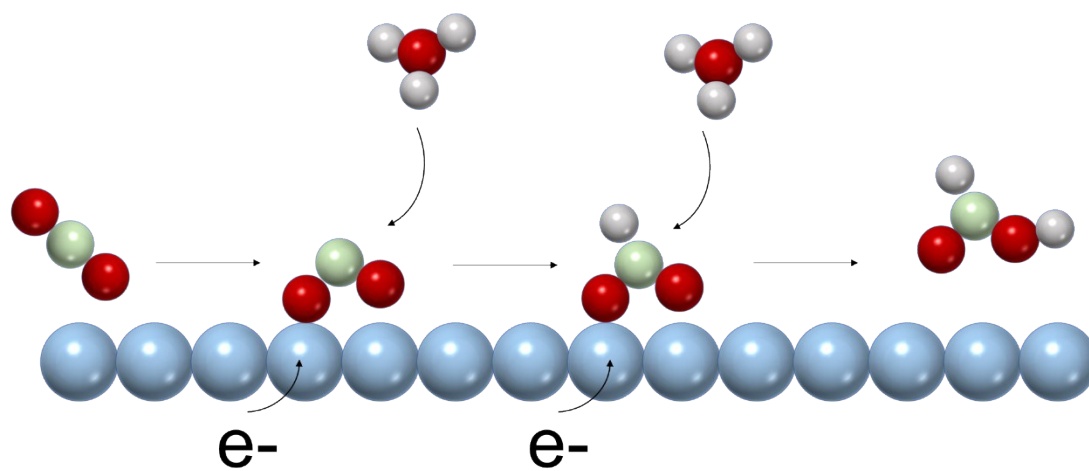

**Figure S28.** Schematic illustration of the carbon dioxide reduction mechanism.
